# Supplementary material
Source: Springer Nature journal article supplement (https://www.springermedizin.de/resource/supplementary/13058_2013_3583_MOESM19_ESM.pdf/9703864)
Supplement: MOESM19 [file 9703864]

Table 6. Effects of diets on plasma levels of growth and inflammatory factors

|                      | 4 wks on diet<br>HFD vs. LFD | 10 wks on diet<br>HFD vs. LFD | Tumors<br>HFD-E vs. LFD |
|----------------------|------------------------------|-------------------------------|-------------------------|
| <b>Plasma Factor</b> | <b>Fold Change</b>           | <b>Fold Change</b>            | <b>Fold Change</b>      |
| HGF                  | -                            | -                             | 2.1                     |
| OPG                  | 1.3                          | -                             | -                       |
| prolactin            | -                            | 0.68                          | -                       |
| IGF-I                | 1.3                          | -                             | -                       |

N=4 HFD 4-wks on diet, N=4 LFD 4-wks on diet  
 N=4 HFD 10-wks on diet, N=4 LFD 10-wks on diet  
 N=6 HFD-E tumors, N=6 LFD tumors  
 $p \leq 0.05$  for all proteins listed
